# Supplementary material for: A Unified 35-Gene Signature for both Subtype Classification and Survival Prediction in Diffuse Large B-Cell Lymphomas
Source: PLoS One. 2010 Sep 13;5(9):e12726. doi: 10.1371/journal.pone.0012726 (PMC2938343; doi:10.1371/journal.pone.0012726)
Supplement: Table S1 — The 35 genes in our signature (0.03 MB XLS) [file pone.0012726.s001.xls]

## Sheet: TableS1
Table S1. The 35 genes in our signature
Order	Gene Symbol	Name	Subtype Gene in SignatureDB	Survival Gene in SignatureDB
1	BATF	basic leucine zipper transcription factor, ATF-like	Yes	No
2	LMO2	LIM domain only 2 (rhombotin-like 1)	Yes	Yes
3	MYBL1	v-myb myeloblastosis viral oncogene homolog (avian)-like 1	Yes	Yes
4	ASB13	ankyrin repeat and SOCS box-containing 13	Yes	Yes
5	DCTD	dCMP deaminase	Yes	No
6	TNFRSF13B	tumor necrosis factor receptor superfamily, member 13B	Yes	No
7	STAG3	stromal antigen 3	Yes	No
8	CREB3L2	cAMP responsive element binding protein 3-like 2	Yes	No
9	CYB5R2	cytochrome b5 reductase 2	Yes	No
10	HDAC1	histone deacetylase 1	Yes	No
11	BSPRY	B-box and SPRY domain containing	Yes	No
12	BCL6	B-cell CLL/lymphoma 6	Yes	Yes
13	FAM108C1	family with sequence similarity 108, member C1	Yes	No
14	NIPA2	non imprinted in Prader-Willi/Angelman syndrome 2	No	No
15	MIR155HG	MIR155 host gene (non-protein coding)	Yes	No
16	PTK2	PTK2 protein tyrosine kinase 2	Yes	Yes
17	RAB7L1	RAB7, member RAS oncogene family-like 1	Yes	No
18	ARID3A	AT rich interactive domain 3A (BRIGHT-like)	Yes	No
19	ITPKB	inositol 1,4,5-trisphosphate 3-kinase B	Yes	Yes
20	KIAA1274	KIAA1274	Yes	No
21	IFRD2	interferon-related developmental regulator 2	No	No
22	TTC9	tetratricopeptide repeat domain 9	Yes	Yes
23	LRMP	lymphoid-restricted membrane protein	Yes	Yes
24	VGLL4	vestigial like 4 (Drosophila)	Yes	Yes
25	SH3BP5	SH3-domain binding protein 5 (BTK-associated)	Yes	No
26	FUT8	fucosyltransferase 8 (alpha (1,6) fucosyltransferase)	Yes	No
27	STAMBPL1	STAM binding protein-like 1	Yes	No
28	TNFAIP8	tumor necrosis factor, alpha-induced protein 8	Yes	No
29	NR3C1	nuclear receptor subfamily 3, group C, member 1 (glucocorticoid receptor)	Yes	No
30	PAG1	phosphoprotein associated with glycosphingolipid microdomains 1	Yes	Yes
31	PIM2	pim-2 oncogene	Yes	No
32	MAPK10	mitogen-activated protein kinase 10	Yes	No
33	SACS	spastic ataxia of Charlevoix-Saguenay (sacsin)	Yes	No
34	ZNF318	zinc finger protein 318	Yes	No
35	CCND2	cyclin D2	Yes	No
